# Supplementary material for: Low nephron endowment increases susceptibility to renal stress and chronic kidney disease
Source: JCI journal article supplement (doi:10.1172/jci.insight.161316), 2023-01-10
Supplement: sd1 [file 1]

You are being redirected.
